# Supplementary material
Source: publisher figshare collection journal article supplement (https://acs.figshare.com/ndownloader/files/13650293)
Supplement: Supplementary file 1 [file 13650293]

## **Molecular Mechanism of Depolarization-Dependent Inactivation in W366F Mutant of Kv1.2**

Hiroko X. Kondo<sup>1,2,†</sup>,

Norio Yoshida<sup>3</sup>, Matsuyuki Shiota<sup>4,5,1</sup>, and Kengo Kinoshita<sup>1,5,6,\*</sup>

<sup>1</sup> Department of Applied Information Sciences, Graduate School of Information Sciences, Tohoku University, 6-3-09 Aramaki-Aza-Aoba, Aoba-ku, Sendai, 980-8579, JAPAN; <sup>2</sup> Laboratory for Computational Molecular Design, RIKEN Center for Biosystems Dynamics Research, 6-2-3, Furuedai, Suita, 565-0874, JAPAN; <sup>3</sup> Department of Chemistry, Graduate School of Science, Kyushu University, 744, Motoooka, Nishi-ku, Fukuoka, 819-0395, JAPAN; <sup>4</sup> Graduate School of Medicine, Tohoku University, 2-1 Seiryomachi, Aoba-ku, Sendai, 980-8575, JAPAN; <sup>5</sup> Tohoku Medical Megabank Organization, Tohoku University, 2-1 Seiryomachi, Aoba-ku, Sendai, 980-8573, JAPAN; <sup>6</sup> Institute of Development, Aging and Cancer, Tohoku University, 4-1 Seiryochō, Aoba-ku, Sendai, 980-8575, JAPAN

---

<sup>†</sup> Current Address: School of Regional Innovation and Social Design Engineering, Kitami Institute of Technology, 165 Koen-cho, Kitami, 090-8507, JAPAN

Figure S1

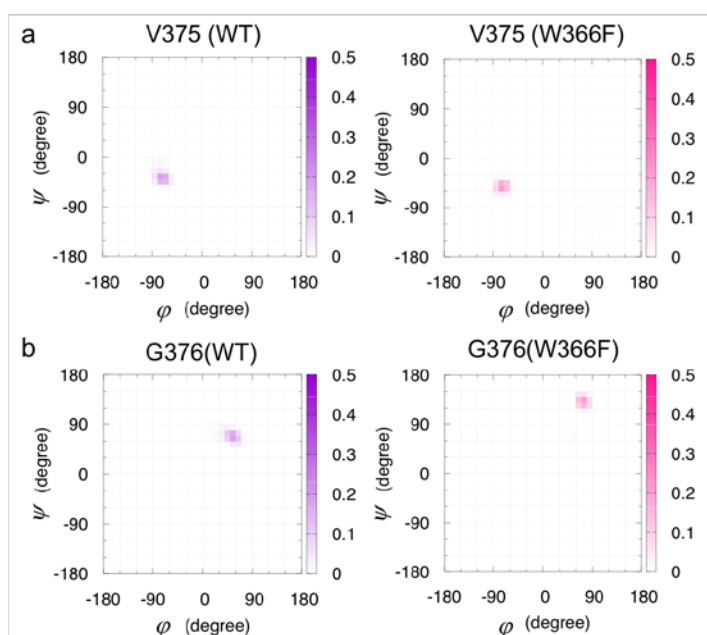

Figure S1. Probability distributions of dihedral angles ( $\varphi$  and  $\psi$ ) of V375 (a) and G376 (b). The left and right panels show the distribution of WT and W366F, respectively.

Figure S2

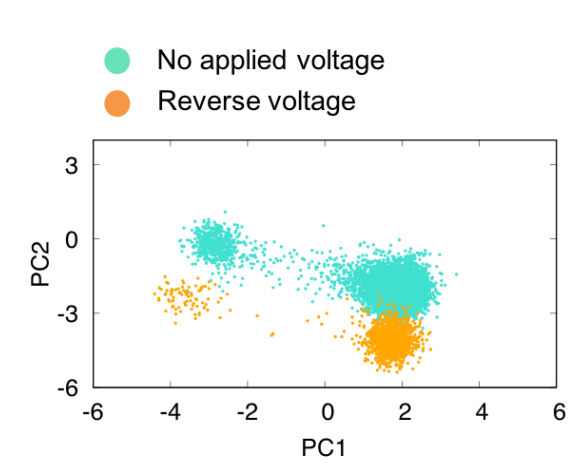

Figure S2. The projection of trajectories with no-applied voltage and reverse voltage onto the first and second principal component axis (PC1 and PC2 values) obtained from PCA of SF conformations of WT and W366F mutant.

Figure S3

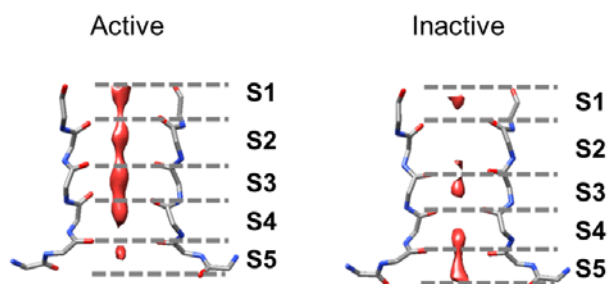

Figure S3. Comparison of the distributions of K<sup>+</sup> ions of W366F mutant with PC1 values of larger than 2.5 (left, active) and less than -2.5 (right, inactive, same as Fig. 3d). These distributions are the average of 10 snapshots. The main-chain atoms of SF (T374–G378) are shown in stick representation. The regions represented as red surface are those with high probability distributions of K<sup>+</sup> ions ( $g(r) > 15.5$ ). Only chain 1 and chain 2 are shown. Five peaks were observed around S1–S5 in the active state.
